# Supplementary material for: Diversity, antibacterial and antioxidant activities of fungi associated with Apis cerana
Source: PeerJ. 2025 Aug 1;13:e19762. doi: 10.7717/peerj.19762 (PMC12320804; doi:10.7717/peerj.19762)
Supplement: Supplemental Information 2 [file peerj-13-19762-s002.xlsx]

## Sheet: antibacterial activity
Isolate	Staphylococcus aureus			Bacillus thuringiensis			Pseudomonas aeruginosa			Escherichia coli			Bacillus subtilis			Pseudomonas syringae pv. actinidiae
	repeat			repeat			repeat			repeat			repeat			repeat
	1	2	3	1	2	3	1	2	3	1	2	3	1	2	3	1	2	3
ZFT05	NI	NI	NI	NI	NI	NI	NI	NI	NI	NI	NI	NI	NI	NI	NI	NI	NI	NI
ZFT07	NI	NI	NI	NI	NI	NI	NI	NI	NI	NI	NI	NI	NI	NI	NI	NI	NI	NI
ZFT12	NI	NI	NI	NI	NI	NI	NI	NI	NI	NI	NI	NI	NI	NI	NI	NI	NI	NI
ZFFC06	NI	NI	NI	NI	NI	NI	NI	NI	NI	NI	NI	NI	NI	NI	NI	NI	NI	NI
ZFFC03	NI	NI	NI	NI	NI	NI	NI	NI	NI	NI	NI	NI	NI	NI	NI	NI	NI	NI
ZFCZ08	NI	NI	NI	NI	NI	NI	NI	NI	NI	NI	NI	NI	8	7	8	NI	NI	NI
ZFCZ19	8	8	7	NI	NI	NI	NI	NI	NI	NI	NI	NI	9	8	8	18	16	16
ZFCZ03	NI	NI	NI	NI	NI	NI	NI	NI	NI	NI	NI	NI	11	9	10	14	12	14
ZFCZ31	8	7	8	NI	NI	NI	NI	NI	NI	NI	NI	NI	8	8	9	12	12	13
ZFCZ15	NI	NI	NI	NI	NI	NI	NI	NI	NI	NI	NI	NI	9	9	9	7	7	7
ZFCZ11	NI	NI	NI	NI	NI	NI	NI	NI	NI	NI	NI	NI	7	7	7	8	7	7
ZFCZ29	NI	NI	NI	NI	NI	NI	NI	NI	NI	NI	NI	NI	9	9	9	12	12	13
ZFCZ12	9	8	9	NI	NI	NI	NI	NI	NI	NI	NI	NI	NI	NI	NI	10	11	9
ZFCZ09	8	7	7	NI	NI	NI	NI	NI	NI	NI	NI	NI	7	7	7	10	10	10
ZFCZ34	NI	NI	NI	NI	NI	NI	NI	NI	NI	NI	NI	NI	NI	NI	NI	10	9	10
ZFFC01	7	7	7	NI	NI	NI	NI	NI	NI	NI	NI	NI	NI	NI	NI	NI	NI	NI
ZFCZ26	NI	NI	NI	NI	NI	NI	NI	NI	NI	NI	NI	NI	NI	NI	NI	NI	NI	NI
ZFCZ33	24	24	25	16	15	15	NI	NI	NI	18	17	16	NI	NI	NI	25	26	25
ZFT04	NI	NI	NI	NI	NI	NI	NI	NI	NI	NI	NI	NI	NI	NI	NI	NI	NI	NI
ZFCZ02	NI	NI	NI	NI	NI	NI	NI	NI	NI	NI	NI	NI	7	7	7	NI	NI	NI
ZFFC04	NI	NI	NI	NI	NI	NI	NI	NI	NI	NI	NI	NI	NI	NI	NI	NI	NI	NI
ZFFC05	NI	NI	NI	NI	NI	NI	NI	NI	NI	NI	NI	NI	NI	NI	NI	NI	NI	NI
Gentamicin sulfate	30	32	31	30	30	31	24	21	22	19	20	18	19	21	20	29	30	30

## Sheet: antioxidant Activity
Isolate	repeat	DPPH radical（%）	ABTS radical (%)	OH radical (%)	O2-radical (%)
ZFT05	1	-	10.2438	-	34.3561
	2	-	10.1717	-	30.1894
	3	-	12.8017	-	17.803
ZFT07	1	55.6651	97.0867	-	22.1591
	2	56.2777	97.1903	-	18.5606
	3	59.2232	97.1213	-	11.3636
ZFT12	1	55.7711	97.0982	3.88453	-
	2	56.6783	97.1328	4.69921	-
	3	57.2203	96.9716	3.77826	-
ZFFC06	1	35.7255	31.4369	-	14.2045
	2	36.1663	30.1969	-	13.6015
	3	35.4268	31.1397	-	18.5606
ZFFC03	1	65.5022	96.3883	2.0072	58.9015
	2	66.8389	96.8296	2.1666	53.9394
	3	66.8247	97.2229	1.91865	57.3106
ZFCZ08	1	79.7748	95.3868	3.28549	18.3712
	2	81.6738	96.0083	0.919227	10.5303
	3	81.8369	95.8768	1.23947	14.4697
ZFCZ19	1	67.8971	96.2406	-	67.2348
	2	71.5807	97.193	-	59.4697
	3	67.9204	96.416	-	53.1439
ZFCZ03	1	88.5413	95.6266	2.92221	68.9015
	2	90.1034	96.817	3.79364	53.4848
	3	90.488	95.8396	1.80677	43.5227
ZFCZ31	1	78.9476	91.4907	-	21.8939
	2	80.3456	91.9688	-	25.303
	3	80.0777	91.909	-	27.4621
ZFCZ15	1	61.6974	93.2331	-	10.4545
	2	65.2319	93.6967	-	14.2045
	3	64.9491	93.797	-	5.68182
ZFCZ11	1	48.3301	92.4229	-	-
	2	49.9612	93.7973	-	-
	3	51.6039	93.5941	-	-
ZFCZ29	1	59.2117	97.1795	2.39592	34.7727
	2	58.7223	97.2632	4.08611	28.3712
	3	62.4738	97.0839	2.71617	31.3258
ZFCZ12	1	66.668	96.5819	-	6.81818
	2	82.5709	96.331	-	13.7121
	3	68.8932	96.8449	-	10.1894
ZFCZ09	1	53.1068	95.7215	-	9.39394
	2	55.9961	96.6656	-	30.5303
	3	56.5903	96.1158	-	14.2424
ZFCZ34	1	85.5222	97.0802	-	22.8409
	2	82.7945	96.8546	-	28.9394
	3	70.3334	96.5664	-	30.2273
ZFFC01	1	19.1733	92.8486	-	9.50758
	2	18.8747	93.38	-	17.5758
	3	13.5564	91.3504	-	12.3864
ZFCZ26	1	31.0033	93.3835	-	26.6667
	2	28.5553	91.9674	-	23.9015
	3	31.7843	92.6065	-	23.5985
ZFCZ33	1	25.5534	78.0456	-	22.2348
	2	26.5786	84.9534	-	26.6288
	3	25.565	86.2441	-	24.1288
ZFT04	1	-	2.91713	-	15.1894
	2	-	9.37704	-	13.5227
	3	-	1.81169	-	15.303
ZFCZ02	1	21.6746	73.6076	-	11.8561
	2	19.978	75.7955	-	15
	3	20.6024	75.4961	-	12.6515
ZFFC04	1	13.0587	14.3119	-	24.8864
	2	13.272	12.5495	-	25.5303
	3	13.2436	10.1537	-	26.1742
ZFFC05	1	11.3665	10.2438	-	-
	2	11.2386	10.1717	-	-
	3	11.4234	12.8017	-	-
Ascorbic acid	1	92.7689	97.2154	93.5773	93.2955
	2	93.309	96.7753	93.2286	93.8258
	3	92.6056	97.4283	93.5569	95.5177
Quercetin	1	89.9146	96.821	14.933	99.6086
	2	90.251	96.6583	15.6393	98.1566
	3	89.2432	97.3631	14.6053	96.0606
